# Supplementary material for: Transcriptomic profiling identifies novel mechanisms of transcriptional regulation of the cytochrome P450 (Cyp)3a11 gene
Source: PubMed Central journal article supplement (PMC6491424; doi:10.1038/s41598-019-43248-w), 2019-04-30
Supplement: 41598_2019_43248_MOESM1_ESM.pdf [file 41598_2019_43248_MOESM1_ESM.pdf]

**Transcriptomic profiling identifies novel mechanisms of transcriptional regulation of the  
cytochrome P450 (*Cyp*)*3a11* gene**

**Guncha Taneja<sup>1</sup>; Suman Maity<sup>2</sup>; Weiwu Jiang<sup>3</sup>; Bhagavatula Moorthy<sup>3</sup>; Cristian Coarfa<sup>4</sup>; Romi  
Ghose<sup>1</sup>**

<sup>1</sup>Department of Pharmacological and Pharmaceutical Sciences, University of Houston, 4849  
Calhoun Rd., Houston, TX 77204, USA

<sup>2</sup>Advanced Technology Cores, Baylor College of Medicine, One Baylor Plaza, Houston, TX  
77030, USA

<sup>3</sup>Department of Pediatrics, Section of Neonatology, Texas Children's Hospital, Baylor College of  
Medicine, 1102 Bates Avenue, Suite 530, Houston, TX 77030, USA

<sup>4</sup>Dan L Duncan Comprehensive Cancer Center, Center for Precision Environmental Health,  
Molecular and Cellular Biology Department, Baylor College of Medicine, One Baylor Plaza,  
Houston, TX 77030, USA

**Corresponding authors:** Romi Ghose, Ph.D., email [rguose@central.uh.edu](mailto:rguose@central.uh.edu)

Cristian Coarfa, PhD, email [coarfa@bcm.edu](mailto:coarfa@bcm.edu)

Bhagavatula Moorthy, PhD., email: [bmoorthy@bcm.edu](mailto:bmoorthy@bcm.edu)

Current affiliation for G.T- DILLsym Services, A Simulations Plus Company, Research Triangle  
Park, North Carolina, 27709, USA

## Supplementary Figures

**Supplementary Figure S1.** Volcano plot showing the differentially regulated genes by PCN and LPS treatment.

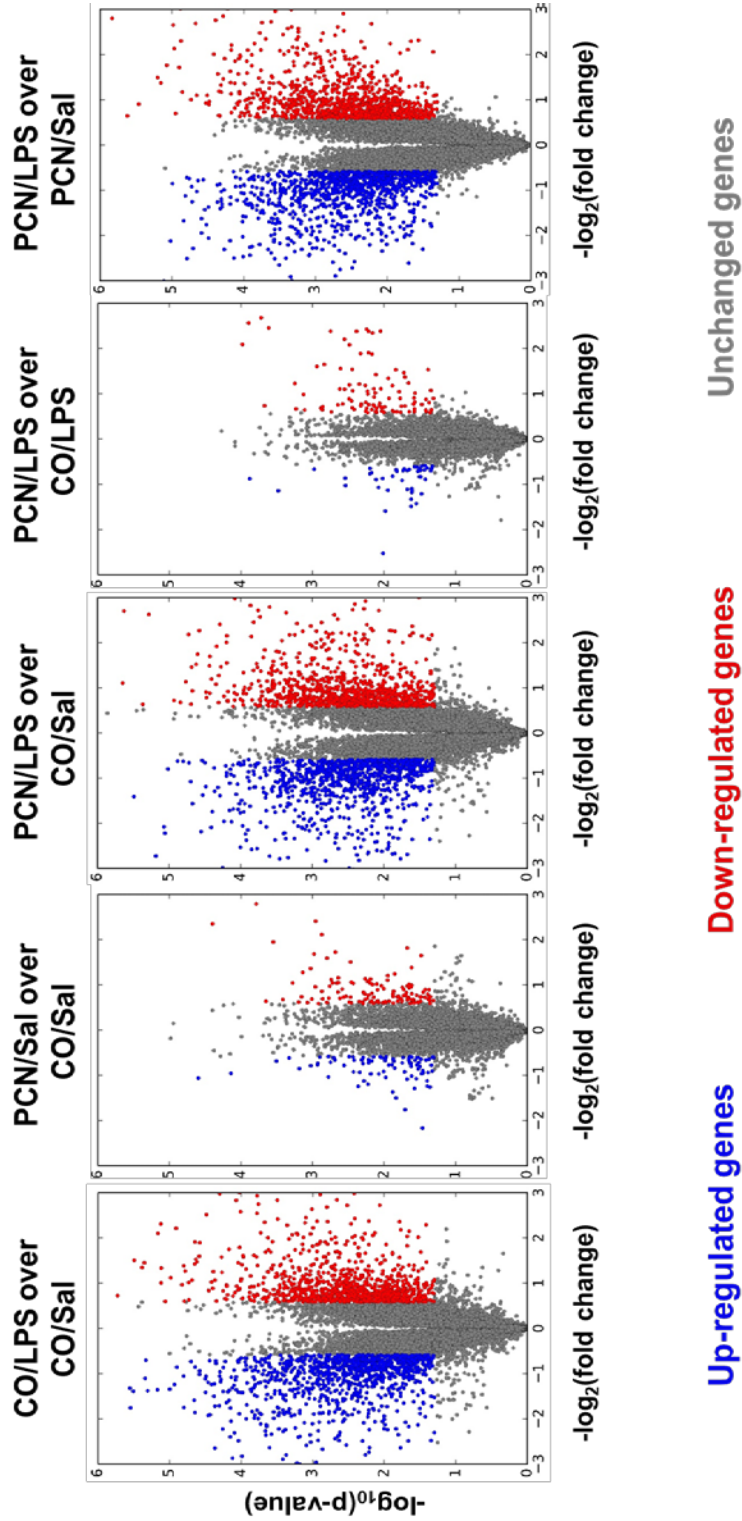

**Supplementary Figure S2.** Heatmap showing the differentially regulated genes with the combined PCN and LPS treatment compared to A. LPS alone and B. PCN alone.

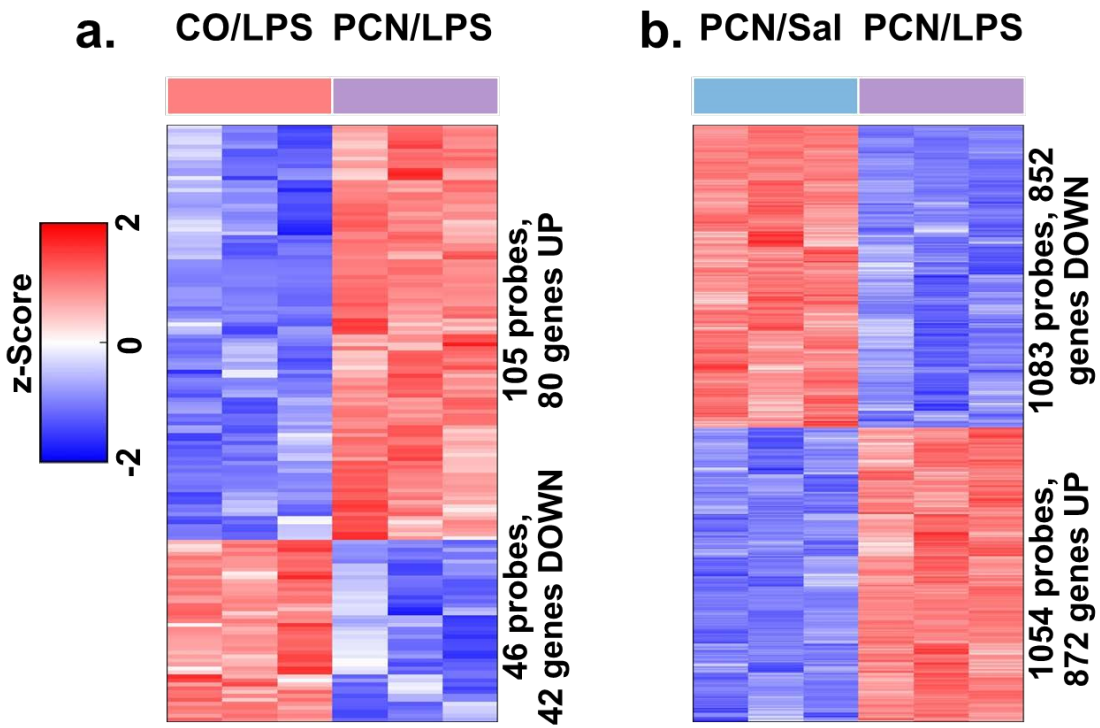

**Supplementary Table S1.** Fold changes in the gene expression of the top 15 genes with PCN and LPS treatment.

**a.** Significantly up-regulated genes ordered from highest to the lowest fold change w.r.t. PCN treatment.

| Gene Symbol | Fold Change    |                |                    |
|-------------|----------------|----------------|--------------------|
|             | PCN vs control | LPS vs control | PCN/LPS vs control |
| GSTM3       | 5.16           | -1.59          | 1.54               |
| CYP2C55     | 4.92           | -1.14          | 1.24               |
| CES6        | 3.88           | -0.64          | 3.53               |
| GSTA1       | 3.83           | -2.24          |                    |
| GSTA2       | 3.48           | -2.48          |                    |
| CYP3A11     | 2.41           | -2.64          | 2.15               |
| GSTM6       | 2.11           | -2.89          | -1.34              |
| GSTM2       | 1.95           | -1.87          |                    |
| HSD17B6     | 1.72           | -1.50          | 0.88               |
| GSTM2       | 1.68           | -1.22          | 0.66               |
| CYP3A25     | 1.36           | -2.40          | 0.94               |
| GSTT3       | 1.13           | -1.28          | -0.90              |
| EPHX1       | 1.12           | -0.60          |                    |
| GSTA4       | 1.20           | -1.46          | -0.78              |
| INMT        | 1.05           | -3.47          | -2.24              |

**b.** Significantly down-regulated genes ordered from lowest to the highest fold change w.r.t. PCN treatment.

| Gene Symbol   | Fold Change    |                |                    |
|---------------|----------------|----------------|--------------------|
|               | PCN vs control | LPS vs control | PCN/LPS vs control |
| SAA4          | -0.92          | 2.68           | 2.26               |
| 2200001I15RIK | -0.85          | 1.05           | 0.89               |
| LRG1          | -0.74          | 1.45           | 1.50               |
| LCAT          | -0.67          | 0.83           | 0.86               |
| LDHA          | -0.64          | 1.15           | 1.12               |
| IIGP2         | -0.62          | 0.94           | 1.00               |
| ACTB          | -0.61          | 0.61           |                    |
| IGTP          | -0.59          | 1.05           | 0.98               |

**Supplementary Table S2.** Altered transcription factors predicted to have putative binding sites on the CYP3A4 promoter using TRANSFAC analysis.

| PCN↓ LPS↓ | PCN↑ LPS↑ | PCN↓ LPS↑     | PCN↑ LPS↓ |
|-----------|-----------|---------------|-----------|
| SP1       | NFE2      | <b>GABP</b>   | MEF2      |
| FOXO4     |           | CETS1P54      |           |
| MAZ       |           | <b>PEA3</b>   |           |
| E12       |           | <b>STAT1</b>  |           |
| FREAC2    |           | <b>NFKB</b>   |           |
| NFAT      |           | <b>IRF</b>    |           |
| LEF1      |           | <b>MYCMAX</b> |           |
| AP4       |           | SP1           |           |
| MYC       |           | AP1           |           |
| HNF3      |           | <b>HSF</b>    |           |
| ETS2      |           |               |           |
| PAX4      |           |               |           |
| MYOD      |           |               |           |
| NFY       |           |               |           |
| CHX10     |           |               |           |
| ERR1      |           |               |           |
